# Supplementary material for: Mutational Signatures in Cancer (MuSiCa): a web application to implement mutational signatures analysis in cancer samples
Source: PubMed Central journal article supplement (PMC6001047; doi:10.1186/s12859-018-2234-y), 2018-06-14
Supplement: 12859_2018_2234_MOESM1_ESM.pdf [file 12859_2018_2234_MOESM1_ESM.pdf]

# Supplementary Material



Mutational Signatures in Cancer

**MuSiCa**

Input file format  
 VCF  TSV  Excel  MAF  
[Help with input file format](#)

Upload your files  
 Browse... TCGA.COAD.mutect.853e5584-b8c3-4836-9bda-6e7e84a64d97.DR-7.0.somatic.maf  
 Upload complete

Reference genome  
 UCSC GRCh38/hg38

Type of study  
 Whole Genome Sequencing  
 Whole Exome Sequencing  
 Targeted Sequencing

Select your samples  
 TCGA-SM-AATE-01A-11D-A40P-10  
 TCGA-A6-2671-01A-01D-1408-10  
 TCGA-A6-2672-01B-03D-2298-08  
 TCGA-A6-2674-01A-02D-A270-10  
 TCGA-A6-2675-01A-02D-1719-10  
 TCGA-A6-2677-01A-01D-A270-10  
 TCGA-A6-2679-01A-02D-1408-10

Show mean

Clear

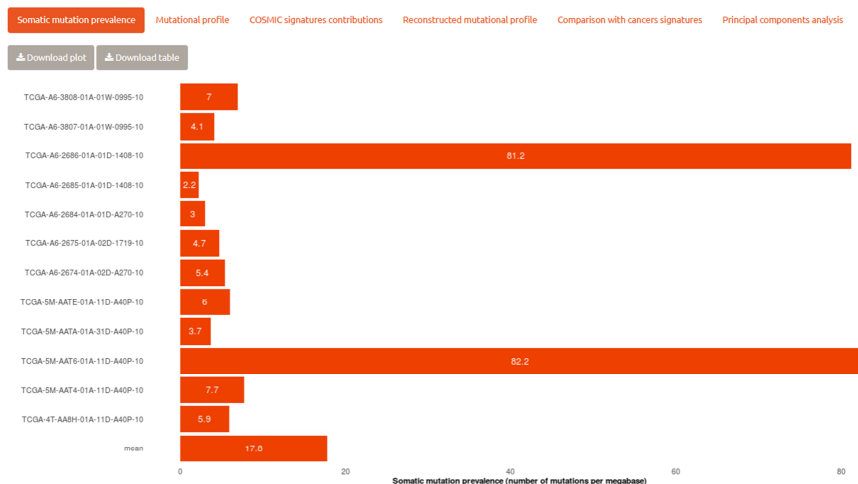

**Supplementary Fig. 1. Somatic mutational prevalence in MuSiCa web app.** Mutational burden output tab showing a subset of the TCGA-COAD project samples and its mean value.



Mutational Signatures in Cancer

**MuSiCa**

Input file format  
 VCF  TSV  Excel  MAF  
[Help with input file format](#)

Upload your files  
 Browse... TCGA.COAD.mutect.853e5584-b8c3-4836-9bda-6e7e84a64d97.DR-7.0.somatic.maf  
 Upload complete

Reference genome  
 UCSC GRCh38/hg38

Type of study  
 Whole Genome Sequencing  
 Whole Exome Sequencing  
 Targeted Sequencing

Select your samples  
 TCGA-SM-AATE-01A-11D-A40P-10  
 TCGA-A6-2671-01A-01D-1408-10  
 TCGA-A6-2672-01B-03D-2298-08  
 TCGA-A6-2674-01A-02D-A270-10  
 TCGA-A6-2675-01A-02D-1719-10  
 TCGA-A6-2677-01A-01D-A270-10  
 TCGA-A6-2679-01A-02D-1408-10

Clear

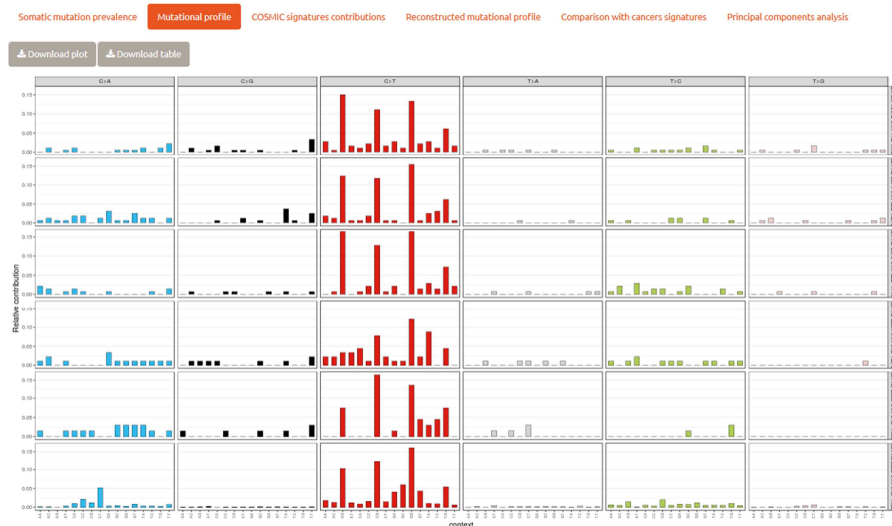

**Supplementary Fig. 2. Mutational profile representation in MuSiCa web app.** Mutational profile output tab showing a subset of the TCGA-COAD samples.

**MuSiCa**

Input file format  
 VCF  TSV  Excel  MAF  
[Help with input file format](#)

Upload your file/s  
 Browse... TCGA-COAD.mutect.853e5584-b8c3-4836-9bda-6e7e84a64d97-DR-7.0.somatic.maf  
 Upload complete

Reference genome  
 UCSC GRCh38/hg38

Type of study  
 Whole Genome Sequencing  
 Whole Exome Sequencing  
 Targeted Sequencing

Select your samples  
 TCGA-SM-AATG-01A-11D-A40P-10  
 TCGA-SM-AATA-01A-31D-A40P-10  
 TCGA-SM-AATE-01A-11D-A40P-10  
 TCGA-A6-2671-01A-01D-1408-10  
 TCGA-A6-2672-01B-03D-3298-08  
 TCGA-A6-2674-01A-02D-A270-10  
 TCGA-A6-2675-01A-02D-1719-10

Clear

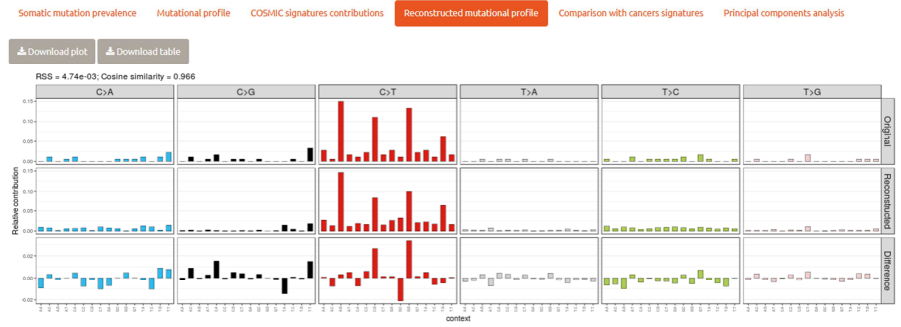

**Supplementary Fig. 3. Reconstruction of mutational profile in MuSiCa web app.** Reconstructed mutational profile output tab showing a specific sample of the TCGA-COAD project.

**MuSiCa**

Input file format  
 VCF  TSV  Excel  MAF  
[Help with input file format](#)

Upload your file/s  
 Browse... TCGA-COAD.mutect.853e5584-b8c3-4836-9bda-6e7e84a64d97-DR-7.0.somatic.maf  
 Upload complete

Reference genome  
 UCSC GRCh38/hg38

Type of study  
 Whole Genome Sequencing  
 Whole Exome Sequencing  
 Targeted Sequencing

Select your samples  
 TCGA-SM-AATE-01A-11D-A40P-10  
 TCGA-A6-2671-01A-01D-1408-10  
 TCGA-A6-2672-01B-03D-3298-08  
 TCGA-A6-2674-01A-02D-A270-10  
 TCGA-A6-2675-01A-02D-1719-10  
 TCGA-A6-2677-01A-01D-A270-10  
 TCGA-A6-2679-01A-02D-1408-10

Show mean

Select the cancers to compare  
 All cancers  
 Adrenocorticalcarcinoma  
 ALL  
 AML  
 Bladder  
 Breast  
 Cervix  
 Chondrosarcoma  
 CLL  
 Colorectum

Column dendrogram  
 yes  no

Row dendrogram  
 yes  no

Show sample names

Clear

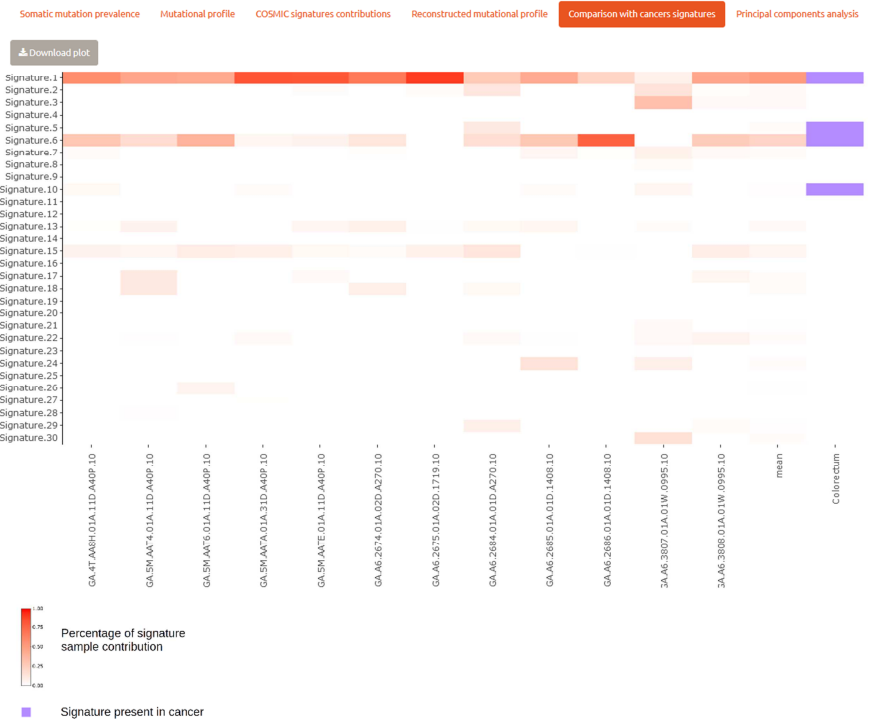

**Supplementary Fig. 4. Comparison with cancer signatures in MuSiCa web app.** Output tab presenting a comparison of known signatures contributions with mutational signatures reported in different human cancer types in a subset of the TCGA-COAD samples and its mean value.

**Input file format**  
 VCF  TSV  Excel  MAF  
[Help with input file format](#)

**Upload your file/s**  
 Browse... TCGA-COAD.mutect.853e5584-b8c3-4836-9bda-6e7e84a64d97.DR-7.0.somatic.maf  
 Upload complete

**Reference genome**  
 UCSC GRCh38/hg38

**Type of study**  
 Whole Genome Sequencing  
 Whole Exome Sequencing  
 Targeted Sequencing

**Select your samples**

- TCGA-5M-AA10-01A-11D-A40P-10
- TCGA-A6-2677-01A-01D-1408-10
- TCGA-A6-2672-01B-03D-2298-08
- TCGA-A6-2674-01A-02D-A270-10
- TCGA-A6-2675-01A-02D-1719-10
- TCGA-A6-2677-01A-01D-A270-10
- TCGA-A6-2679-01A-02D-1408-10

Clear

Somatic mutation prevalence    Mutational profile    COSMIC signatures contributions    Reconstructed mutational profile    Comparison with cancers signatures    **Principal components analysis**

Download plot    Download table

| ID | Sample                       |
|----|------------------------------|
| 1  | TCGA-4T-AA8H-01A-11D-A40P-10 |
| 2  | TCGA-5M-AA10-01A-11D-A40P-10 |
| 3  | TCGA-5M-AA10-01A-11D-A40P-10 |
| 4  | TCGA-5M-AA10-01A-11D-A40P-10 |
| 5  | TCGA-5M-AA10-01A-11D-A40P-10 |
| 6  | TCGA-A6-2674-01A-02D-A270-10 |
| 7  | TCGA-A6-2675-01A-02D-1719-10 |
| 8  | TCGA-A6-2684-01A-01D-A270-10 |
| 9  | TCGA-A6-2685-01A-01D-1408-10 |
| 10 | TCGA-A6-2686-01A-01D-1408-10 |
| 11 | TCGA-A6-3807-01A-01W-0995-10 |
| 12 | TCGA-A6-3808-01A-01W-0995-10 |
| 13 | mean                         |

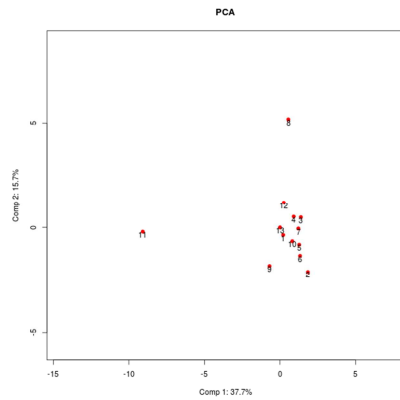

**Supplementary Fig. 5. Principal component analysis in MuSiCa web app.** Principal component analysis output tab presenting a classification of a specific subset of the TCGA-COAD samples according to the quantification of known signatures contributions.
